# Supplementary material for: Bioengineered polyester beads co-displaying protein and carbohydrate-based antigens induce protective immunity against bacterial infection
Source: PubMed Central journal article supplement (PMC5789850; doi:10.1038/s41598-018-20205-7), 2018-01-30
Supplement: 41598_2018_20205_MOESM1_ESM.pdf [file 41598_2018_20205_MOESM1_ESM.pdf]

## Supplementary material

### **Bioengineered polyester beads co-displaying protein and carbohydrate-based antigens induce protective immunity against bacterial infection**

Majela González-Miro<sup>1,2</sup>, Laura M Rodríguez-Noda<sup>2</sup>, Mildrey Fariñas-Medina<sup>2</sup>, Barbara Cedré-Marrero<sup>2</sup>, Sandra Madariaga-Zarza<sup>2</sup>, Caridad Zayas-Vignier<sup>2</sup>, Mabel Hernández-Cedeño<sup>2</sup>, Torsten Kleffmann<sup>3</sup>, Dagmar García-Rivera<sup>2</sup>, Vicente Vérez-Bencomo<sup>2</sup>,

Bernd H. A. Rehm<sup>1, 4\*</sup>

<sup>1</sup>Institute of Fundamental Sciences, Massey University, Palmerston North, New Zealand

<sup>2</sup>Finlay Vaccine Institute, La Havana, Cuba;; <sup>3</sup>Biochemistry Department, University of Otago, New Zealand; <sup>4</sup>Centre for Cell Factories and Biopolymers, Griffith Institute for Drug Discovery, Griffith University, Nathan, Queensland, Australia

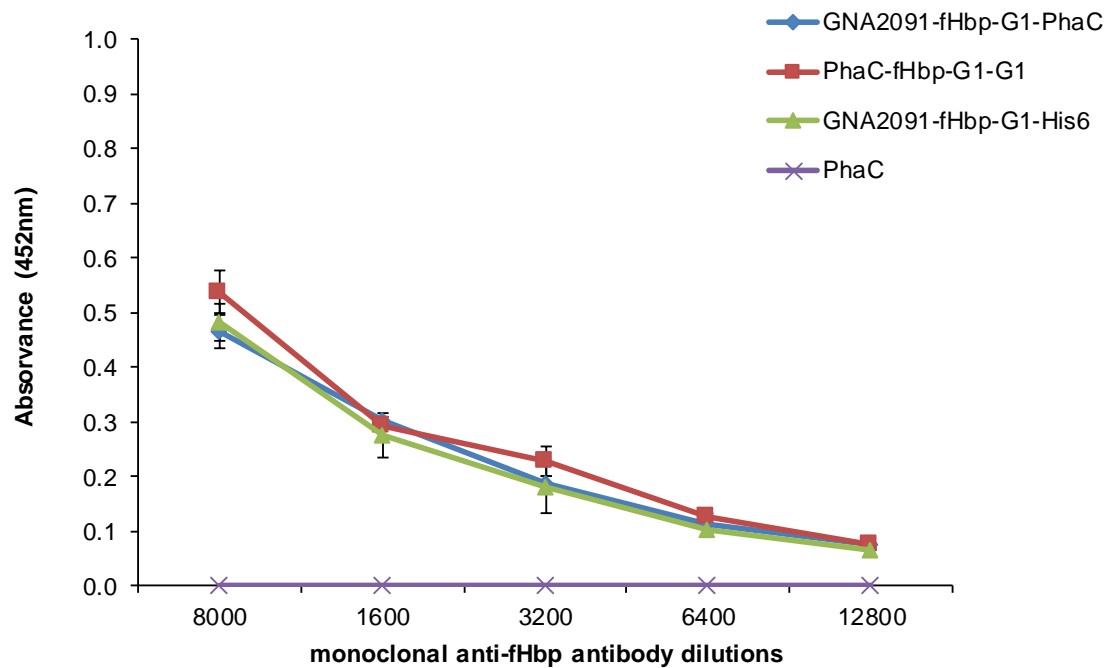

**Supplementary Figure 1:**

**FHbp confirmation of molecular identity and bead display by ELISA using a commercial monoclonal anti-fHbp antibody (JAR4, NIBCS, UK).**

Maxisorp 96-well plates (NUNC) were coated using 0.5  $\mu\text{g/ml}$  of each protein and the rest of assay was performed as mentioned above<sup>1</sup>. The results are expressed as the mean  $\pm$  SD of two replicas per sample.

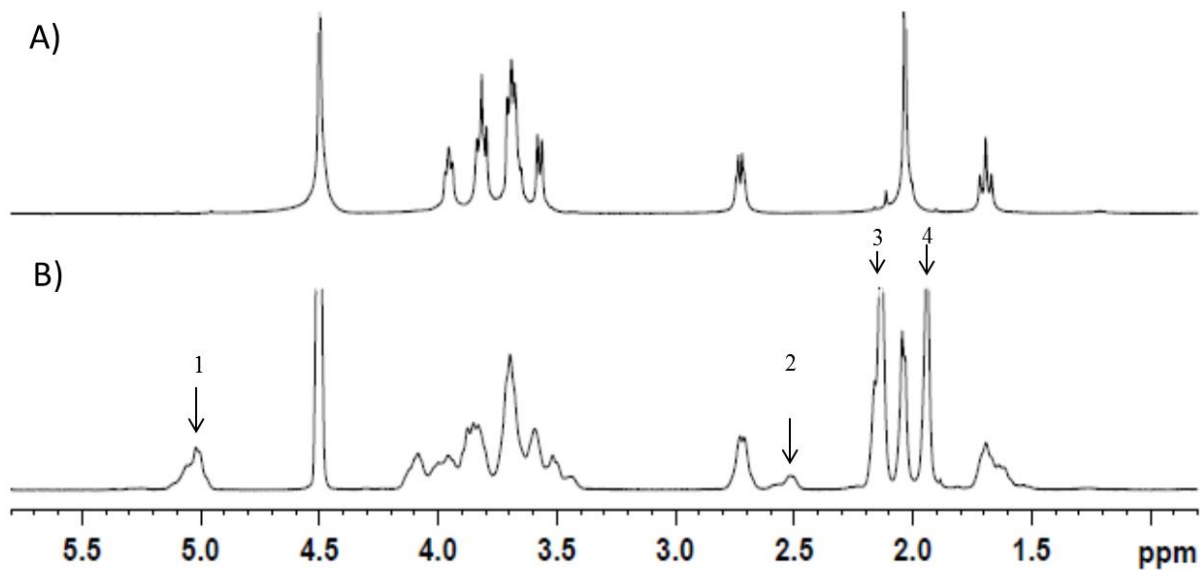

**Supplementary Figure 2:**

**<sup>1</sup>H NMR monodimensional spectra of CPS.**

A) Activated polysaccharide (APS) and B) Capsular polysaccharide (CPS), both from *Neisseria meningitidis* Serogroup C. The peaks 1,2,3, and 4 are missing in the Aps spectrum because the O-Acetyl groups were removed during activation reaction, but the rest of the chemical structure are conserved after activation as mentioned above <sup>2</sup>.

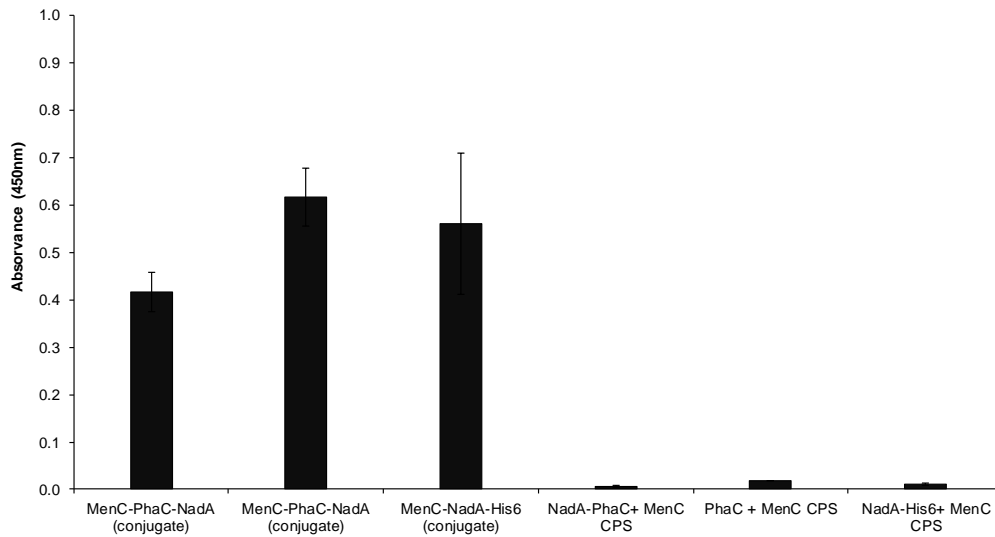

### Supplementary Figure 3:

#### **MenC confirmation of molecular identity by ELISA using a commercial anti-CPS (MenC) monoclonal antibody (NIBS, UK).**

Maxisorp 96-well plates (NUNC) were coated using 5  $\mu\text{g/ml}$  of MenC CPS conjugated or mixed to NadA-PhaC beads, PhaC wild type beads and NadA-His6 the rest of assay was performed as mentioned above<sup>1</sup>. The results are presented as the mean  $\pm$  SD of two replicas. The results are expressed as the mean  $\pm$  SD of two replicas per sample.

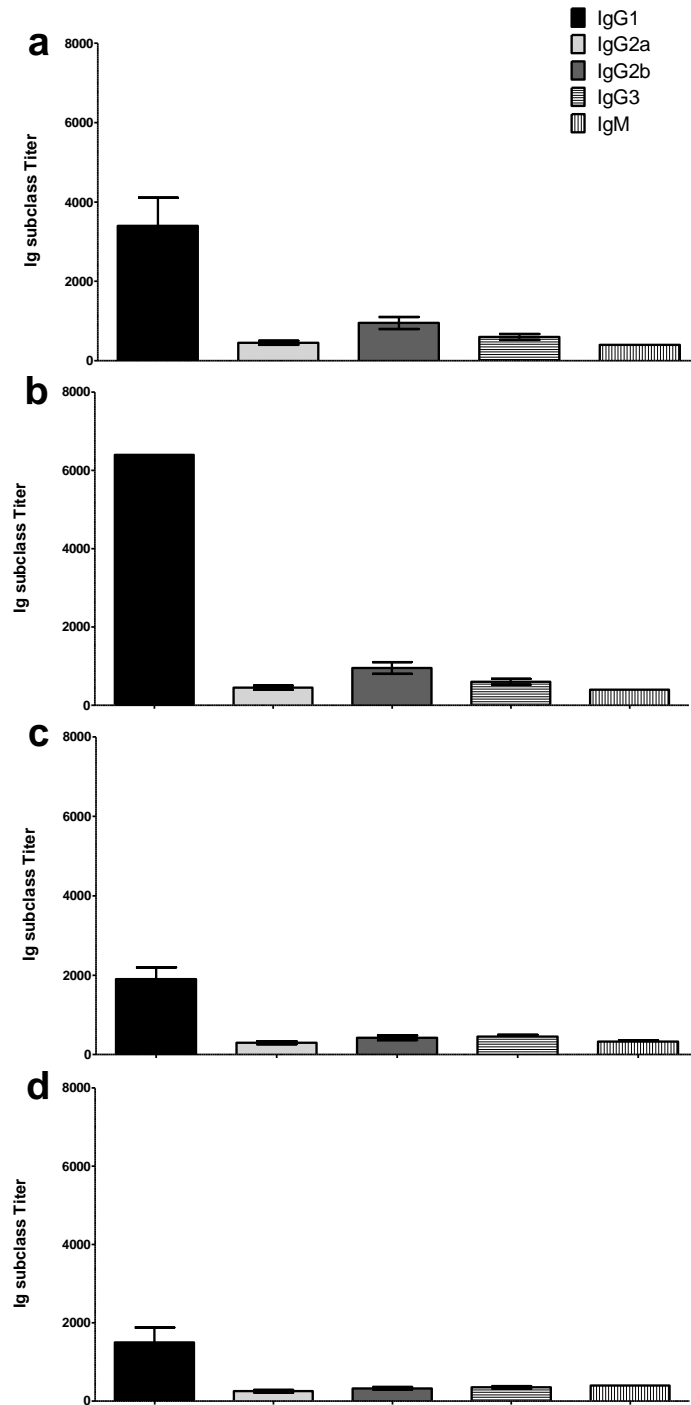

**Supplementary Figure 4:**

**Assessment of IgG subclass binding to MenC evaluated by ELISA.**

Results are expressed as the mean  $\pm$  SEM of 8 animals and the titer was calculate as mentioned above. **a.** animals vaccinated with 4 $\mu$ g of MenC conjugated to NadA-PhaC beads; **b.** animals vaccinated with 4 $\mu$ g of MenC conjugated to PhaC wild type beads; **c.** animals vaccinated with 4 $\mu$ g of MenC conjugated to soluble NadA-His6; **d.** animals vaccinated with 4 $\mu$ g of MenC conjugated to DT.

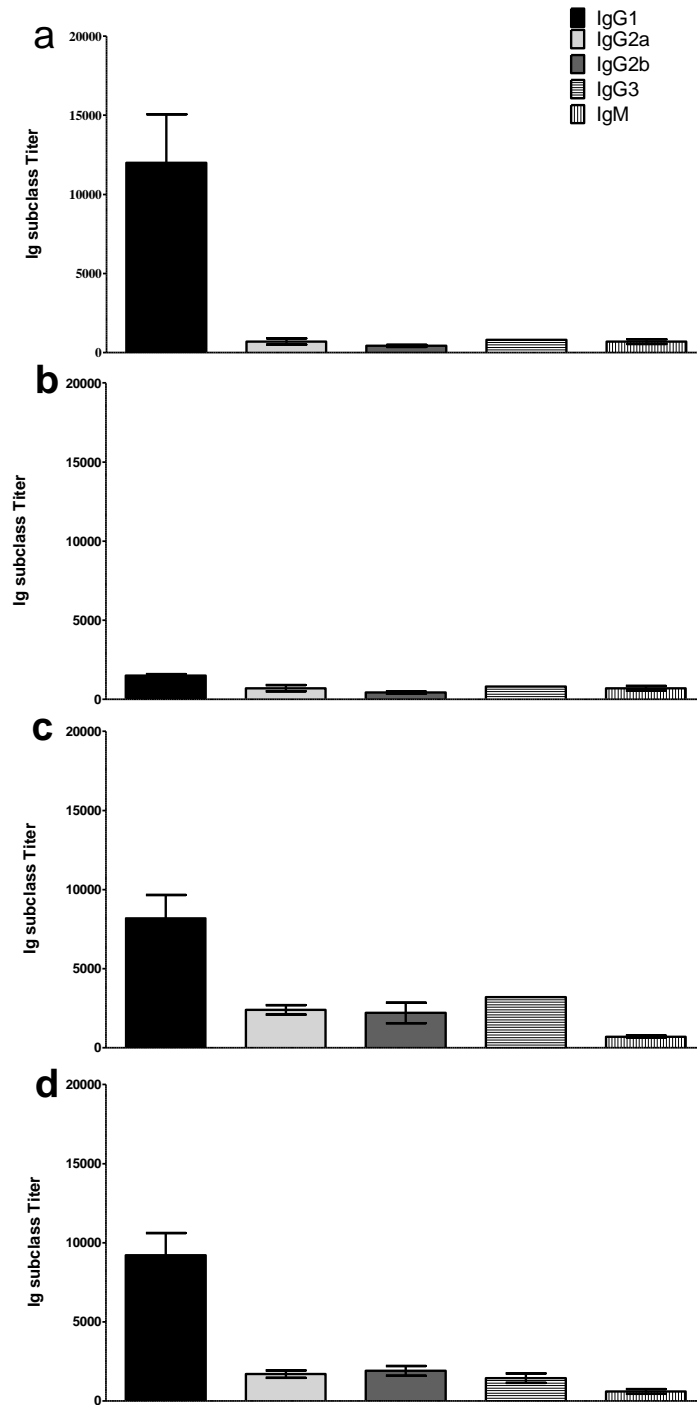

**Supplementary Figure 5:**

**Assessment of IgG subclass binding to NadA protein evaluated by ELISA.**

Results are expressed as the mean  $\pm$  SEM of 8 animals and the titer was calculate as mentioned above. **a.** animals vaccinated with 4 $\mu$ g of MenC conjugated to NadA-PhaC beads; **b.** animals vaccinated with 4 $\mu$ g of MenC conjugated to soluble NadA-His6; **c.** animals vaccinated with 18 $\mu$ g of protein from NadA-PhaC beads; **d.** animals vaccinated with 18 $\mu$ g of protein from NadA-PhaC beads without alum.



**Supplementary Table 2: Identification of fusion proteins by peptide fingerprinting analysis (MALDI-TOF/MS)**

| <b>Fusion proteins</b>       | <b>Peptides fragment identified by MALDI-TOF/MS.*</b>                                                                                                                                                               |
|------------------------------|---------------------------------------------------------------------------------------------------------------------------------------------------------------------------------------------------------------------|
| <u>NadA</u> -PhaC            | <u>A11-K47, L134-K146, Q267-R309, A317-K341</u> , V482-R498, I535-K552, F608-641, I657-K691, Y712-K874, L928-K979, R1025-R1035                                                                                      |
| <u>GNA2091-fHbp-G1</u> -PhaC | <u>T31-R45, G52-R64, Q78-105, V170-R180, D212-R224, F259-R263, I315-R347, S388-R395, G405-R414</u> , V641-R476, I503-R514, A531-R565, F586-R620, I635-R647, Y690-R745, E811-R826, H873-K938, F940-K958, A1004-R1023 |
| PhaC- <u>fHbp-G1-G1</u>      | A2-W31, A59-Y65, L161-L171, T191-T218, T232-L240, V262-F273, I305-L316, A333-L346, R386-W404, L546-W554, R575-Y584, <u>A592-I638, T643-Y665, T725-M731, R738-Y77, K793-Y822</u>                                     |

\* Red bold, identified peptides belonging to the respective neisserial antigen.



**Supplementary Table 3:****Correlation between Zeta potential and pH of various PHB beads.**

| <b>PHB beads</b>                         | <b>Theoretical pI of the respective protein*</b> | <b>Zeta potential (mV) pH (3.5) **</b> | <b>Zeta potential (mV) pH (5.5) **</b> | <b>Zeta potential (mV) pH (7.5) **</b> |
|------------------------------------------|--------------------------------------------------|----------------------------------------|----------------------------------------|----------------------------------------|
| NadA-PhaC on PHB beads                   | 5.01                                             | 5.20 ± 0.9                             | -13.3 ± 2.2                            | -20.4 ± 3.2                            |
| GNA2091-fHbp-G1-PhaC on PHB beads        | 6.77                                             | 16.2 ± 1.4                             | -8.9 ± 0.9                             | -16.5 ± 2.5                            |
| PhaC-fHbp-G1-G1 on PHB beads             | 6.21                                             | 11.1 ± 2                               | -8.4 ± 0.7                             | -17.9 ± 2                              |
| PhaC, (non-antigen displaying PHB beads) | 6.08                                             | 14.4 ± 1.8                             | -5.7 ± 0.9                             | -16.8 ± 0.35                           |

\* [ExPASy - Compute pI/Mw tool](#) (theoretical isoelectric point (pI)); \*\* mean of 3 replicates ± SD.

**Supplementary Table 4:****Amount of neisserial antigen attached to PHB beads and immunization doses.**

| <b>PHB beads</b>               | <b>neisserial antigen/ wet Bead (µg/mg)</b> | <b>neisserial antigen immunization dose (µg)</b> | <b>PHB beads immunization dose (mg)</b> |
|--------------------------------|---------------------------------------------|--------------------------------------------------|-----------------------------------------|
| NadA-PhaC                      | 0.254                                       | 2                                                | 10                                      |
| GNA2091-fHbp-G1-PhaC           | 0.677                                       | 7                                                | 10                                      |
| PhaC-fHbp-G1-G1                | 0.110                                       | 1                                                | 10                                      |
| <b>PHB beads</b>               | <b>PhaC/ wet Bead (µg/mg)</b>               | <b>PhaC immunization dose (µg)</b>               | <b>PHB beads immunization dose (mg)</b> |
| PhaC, (non-antigen displaying) | 0.977                                       | 7                                                | 7                                       |

**Supplementary Table 5:**

**Carbohydrate/protein ratios and carbohydrate yield after conjugation and purification.**

| <b>Conjugated</b>    | <b>Carbohydrate/protein ratio (mg/mg)</b> | <b>Carbohydrate yield (%)</b> |
|----------------------|-------------------------------------------|-------------------------------|
| MenC-NadA-PhaC beads | 0.20/1                                    | 4.0                           |
| MenC-PhaC beads      | 0.27/1                                    | 4.4                           |
| MenC-NadA-His6       | 2.4/1                                     | 30.2                          |
| MenC-DT              | 2.5/1                                     | 36.0                          |

## Supplementary Table 6

Conjugation site analysis results by liquid chromatography-coupled tandem mass spectrometry (LC-MS/MS). Tryptic and chymotryptic digests of non-conjugated and conjugated proteins either soluble or attached to PHB beads were analysed by liquid chromatography-coupled LTQ-Orbitrap tandem mass spectrometry. Significant differences in peptide abundances between the non-conjugated and conjugated proteins were identified by comparing precursor peak intensities using the SIEVE software (ThermoScientific).

| Samples                                                | Chymotryptic (C)/tryptic (T) peptides >3-fold more abundant in non-conjugated sample versus conjugated sample based on LC/MS-MS analysis*                              | Amino acid sequence of targeted protein showing putative conjugations sites in bold                                                                                                                                                                                                                                                                                                                                                                                                                                                                                                                                                                                                                                                                                                                                                                                                                      |
|--------------------------------------------------------|------------------------------------------------------------------------------------------------------------------------------------------------------------------------|----------------------------------------------------------------------------------------------------------------------------------------------------------------------------------------------------------------------------------------------------------------------------------------------------------------------------------------------------------------------------------------------------------------------------------------------------------------------------------------------------------------------------------------------------------------------------------------------------------------------------------------------------------------------------------------------------------------------------------------------------------------------------------------------------------------------------------------------------------------------------------------------------------|
| PhaC versus conjugated PhaC displayed on PHB beads (C) | <p>NARALTELADAVEADAKTRQRIR<br/>F<br/>GNARYRAIEPAPGRYVKAKA<br/>TGKGAAASTQEGKSQPF+Carbami<br/>domethyl (13) Formyl (3)<br/>AAIRAIEVARDISGQDKINVL<br/>RAIEPAPGRYVKAKA</p> | <p>PhaC (64.2kDa)</p> <p>MATG<b>K</b>GAAASTQEG<b>K</b>SQPF<br/>KVTPGPFDPATWLEWSRQW<br/>QGTEGNGHAAASGIPGLDAL<br/>AGVKIAPAQLGDIQQR<b>Y</b>MKD<br/>FSALWQAMAEGKA<b>E</b>ATGPL<br/>HRRRFAGDAWRTNLPYRFA<br/>AAFYLLNARALTELADAVEA<br/>DA<b>K</b>TRQRIRFAISQWVDAMS<br/>PANFLATNPEAQRL<b>L</b>IESGGE<br/>SLRAGVRNMEDLTRG<b>K</b>ISQ<br/>TDESAFEVGRNVAVTEGAVV<br/>FENEYFQLLQYKPLTDKVHA<br/>RPLLMVPPCINKYYILD<b>L</b>QPE<br/>SSLVRHVVEQGHTVFLVSWR<br/>NPDASMAGSTWDDYIEHAAI<br/>RAIEVARDISGQD<b>K</b>INVLGFC<br/>VGGTIVSTALAVLAARGEHP<br/>AASVTLTLLDFADTGILDV<br/>FVDEGHVQLREATLGGGAG<br/>APCALLRGGLELANTFSFLRPN<br/>DLVWNYVVDNYLKGNT<b>P</b>V<br/>FDLLFWNGDATNLP<b>G</b>PWYC<br/>WYLRHTYLQNELKV<b>P</b>GKLT<br/>VCGVPVDLASIDVPT<b>Y</b>IYGSR<br/>EDHIVPWTAAYASTALLANK<br/>LRFVLGASGHIAGVIN<b>P</b>PAKN<br/>KRSHWTNDALPES<b>P</b>QQWLA<br/>GAIEHHGSWWPDWTAWLAG<br/>QAGAKRAAPANYGNARYRA<br/>IEPAPGRYV<b>K</b>AKA</p> |

|                                                                  |                                                                                                                                               |                                                                                                                                                                                                                                                                                                                                                                                                                                                                                                                                                                                                                                                                                                                                                                                                                                                                                                                                                                                                                                                                                                                                                                                                                                                                                                                                                                                                                                                                                                 |
|------------------------------------------------------------------|-----------------------------------------------------------------------------------------------------------------------------------------------|-------------------------------------------------------------------------------------------------------------------------------------------------------------------------------------------------------------------------------------------------------------------------------------------------------------------------------------------------------------------------------------------------------------------------------------------------------------------------------------------------------------------------------------------------------------------------------------------------------------------------------------------------------------------------------------------------------------------------------------------------------------------------------------------------------------------------------------------------------------------------------------------------------------------------------------------------------------------------------------------------------------------------------------------------------------------------------------------------------------------------------------------------------------------------------------------------------------------------------------------------------------------------------------------------------------------------------------------------------------------------------------------------------------------------------------------------------------------------------------------------|
|                                                                  |                                                                                                                                               | Lysine residues (labelled bold) represent putative polysaccharide conjugations sites:<br><b>K</b> : 5, 15, 139, 312, 498, 586, 588                                                                                                                                                                                                                                                                                                                                                                                                                                                                                                                                                                                                                                                                                                                                                                                                                                                                                                                                                                                                                                                                                                                                                                                                                                                                                                                                                              |
| NadA-PhaC versus conjugated NadA-PhaC displayed on PHB beads (C) | AAIRAIEVARDISGQDKINVL<br>ATSDDDVKKKAATVAI<br>ATSDDDVKKKAATVAIVAA<br>DVEADDFKGL<br>NARALTELADAVEADAK<br>NARALTELADAVEADAKTR<br>TKTVNENKQNVDKVK | NadA (1-463)-PhaC (464-1051) fusion protein (112.8kDa)<br><br>MATSDDDDV <b>K</b> KAATVAIVAA<br>YNNQGEINGFKAGETIYDIGE<br>DGTITQKDATAADVEADDF <b>K</b><br>GLGLKKVVTNLT <b>K</b> TVNEN <b>K</b><br>QNVD <b>A</b> <b>K</b> V <b>K</b> AAESEIEKLTTK<br>LADTDAALADTDAALDETTN<br>ALNKLGENITTFAEETKTNIV<br>KIDEKLEAVADTVDKHAEAF<br>NDIADSLDETNTKADEAVKT<br>ANEAKQTAETKQNVD <b>A</b> KV<br>KAAETAAGKAEAAAGTANT<br>AADKAEVA <b>A</b> KVTDIKADIA<br>TNKADIAKNSARIDSLDKNV<br>ANLRKETRQGLAEQAALSGL<br>FQPYNVGRFNVTA <b>A</b> VGGYKS<br>ESAVAIGTGFRFTENFA <b>A</b> KAG<br>VAVGTSSGSS <b>A</b> YHVG <b>V</b> NYE<br>WKAGETIYDIGEDGTITQKD<br>KAGETIYDIGEDGTITQK <b>D</b> KA<br>GETIYDIGEDGTITQK <b>D</b> TSDD<br>DV <b>K</b> KAATVAIVTSDDDDV <b>K</b><br>AATVAIVT <b>K</b> TVNEN <b>K</b> QNVD<br><b>A</b> <b>K</b> V <b>K</b> AT <b>K</b> TVNEN <b>K</b> QNVD <b>A</b><br><b>K</b> V <b>K</b> ATSATGKGAAASTQEG<br>KSQPFKVTPGPFDPATWLEW<br>SRQWQGTEGNGHAAASGIPG<br>LDALAGVKIAPAQLGDIQQR<br>YMKDFSALWQAMAEGKAE <b>A</b><br>TGPLHDRRFAGDAWR <b>T</b> NLPY<br>RFA <b>A</b> AFYLLNARALTELADA<br>VEAD <b>A</b> <b>K</b> TRQRIRFAISQWVD<br>AMSPANFLATNPE <b>A</b> Q <b>R</b> LLIES<br>GGESLRAGVRNM <b>M</b> EDLTRG<br>KISQTDESAFEVGRNV <b>V</b> TE<br>GAVVFENEYFQL <b>L</b> QYKPLTD<br>KVHARPL <b>L</b> MVPPCINKYYILD<br>LQPESSLVRHVVEQGH <b>T</b> VFL<br>VSWRNPDAS <b>M</b> AGSTWDDYI<br>EHAAIRAIEVARDISGQD <b>K</b> IN<br>VLGFCVGGTIVSTAL <b>A</b> V <b>L</b> AA<br>RGEHPAASV <b>T</b> LL <b>T</b> LL <b>D</b> FADT |

|                                                                         |                                                                                                                                                                                                                                                                                                                                                                                                                                                                                                                                                                                                                                             |                                                                                                                                                                                                                                                                                                                                                                                                                                                                                                                                                                                               |
|-------------------------------------------------------------------------|---------------------------------------------------------------------------------------------------------------------------------------------------------------------------------------------------------------------------------------------------------------------------------------------------------------------------------------------------------------------------------------------------------------------------------------------------------------------------------------------------------------------------------------------------------------------------------------------------------------------------------------------|-----------------------------------------------------------------------------------------------------------------------------------------------------------------------------------------------------------------------------------------------------------------------------------------------------------------------------------------------------------------------------------------------------------------------------------------------------------------------------------------------------------------------------------------------------------------------------------------------|
|                                                                         |                                                                                                                                                                                                                                                                                                                                                                                                                                                                                                                                                                                                                                             | <p>GILDVVFVDEGHVQLREATLG<br/>GGAGAPCALLRGLELANTFS<br/>FLRPNDLVWNYVVDNYLKG<br/>NTPVPDFLLFWNGDATNLPG<br/>PWYCWYLRHTYLQNELKVP<br/>GKLTVCVGPVDLASIDVPTYI<br/>YGSREDHIVPWTAAYASTAL<br/>LANKLRFVLGASGHIAGVINP<br/>PAKNKRSHWTNDALPESPQQ<br/>WLAGAIEHHGSSWWPDWTA<br/>WLAGQAGAKRAAPANYGNA<br/>RYRAIEPAPGRYVKAKA</p> <p>Lysine residues (labelled in bold) represent putative polysaccharide conjugations sites:<br/><b>K</b>: 9, 10, 60, 73, 79, 85, 87, 429, 435, 441, 443, 446, 452, 458, 460, 601 (139 in PhaC), 774 (312 in PhaC)<br/>Italics: Conjugation sites not found in soluble NadA</p>     |
| <p>NadA-PhaC versus conjugated NadA-PhaC displayed on PHB beads (T)</p> | <p>AATVAIVAAYNNGQEINGFK+Deamidated (11) Deamidated (12)<br/>AATVAIVAAYNNGQEINGFK+Deamidated (12)<br/>AATVAIVAAYNNGQEINGFK+Deamidated (12) Deamidated (17)<br/>ASMAGSTWDDYIEHAIR<br/>CVGGTIVSTALAVLAAR+Carbamidomethyl (1)<br/>DASMAGSTWDDYIEHAIR<br/>DFSALWQAMAEGK<br/>DFSALWQAMAEGK+Carbamidomethyl (13)<br/>DFSALWQAMAEGKAEATGPLHDR<br/>EDHIVPWTAAYASTALLAN<br/>EDHIVPWTAAYASTALLANK<br/>EDHIVPWTAAYASTALLANKLR<br/>EDHIVPWTAAYASTALLANKLR+Carbamidomethyl (20)<br/>FAISQWVDAMSPANFLATNPEAQR+Oxidation (6)<br/>FAISQWVDAMSPANFLATNPEAQR+Oxidation (6) Oxidation (10)<br/>GLELANTFSFLR<br/>GVPVDLASIDVPTYIYGSRLADTDAALADTDAALDETTNALNK</p> | <p>NadA (1-463)-PhaC (464-1051) fusion protein (112.8kDa)</p> <p>MATSDDDDVKKAAATVAIVAAYNNGQEINGFKAGETIYDIGEDGTITQKDATAADVEADDFKGLGLKKVVTNLTKTVNENKQNVDAKVKAASEIEKLTTKLADTDAALADTDAALDETTNALNKLGENITTFEETKTNIVKIDEKLEAVADTVDKHAEAFNDIADSLDETNTKKADEAVKTANEAKQTAEEKQNVDAKVKAAETAAGKAEAAAGTANTAADKAEAVAAKVTDIKADIA TNKADIAKNSARIDSLDKNVANLRKETRQGLAEQAALSGLFQPYNVGRFNVTAAVGGYKSESAVAIGTGFRFTENFAAKAGVAVGTSSGSSAAYHVGVNYESWKAGETIYDIGEDGTITQDKAGETIYDIGEDGTITQKDKAGETIYDIGEDGTITQKDTSSDDVKKAAATVAIVTSSDDDVKKAAATVAIVTKTVNENKQNVDAKV KATKTVNENKQNVDAKVKATSATGKGAAASTQEGKSQPFKVTPGPFDPATWLEWSRQ</p> |

|                                                                        |                                                                                                                                                                                                                                                                                                                    |                                                                                                                                                                                                                                                                                                                                                                                                                                                                                                                                                                                                                                                                                                                                                                                                                                                                                                                                                                                                                                                                                                                                                  |
|------------------------------------------------------------------------|--------------------------------------------------------------------------------------------------------------------------------------------------------------------------------------------------------------------------------------------------------------------------------------------------------------------|--------------------------------------------------------------------------------------------------------------------------------------------------------------------------------------------------------------------------------------------------------------------------------------------------------------------------------------------------------------------------------------------------------------------------------------------------------------------------------------------------------------------------------------------------------------------------------------------------------------------------------------------------------------------------------------------------------------------------------------------------------------------------------------------------------------------------------------------------------------------------------------------------------------------------------------------------------------------------------------------------------------------------------------------------------------------------------------------------------------------------------------------------|
|                                                                        | <p>LADTDAALADTDAALDETTNALN<br/>K+Deamidated (23)<br/>LDETNTKADEAVKTANEAK+Carb<br/>amidomethyl (13) Deamidated (5)<br/>Formyl (19)<br/>NMEDLTRGKISQTDESAFEVGR<br/>PATWLEWSR<br/>PDASMAGSTWDDYIEHAAIR<br/>PNDLVWNYVVDNYLK<br/>TDAALADTDAALDETTNALNK<br/>VTPGPFDPATWLEWSR<br/>VTPGPFDPATWLEWSR+Oxidation<br/>(11)</p> | <p>WQGTEGNGHAAASGIPGLDA<br/>LAGVKIAPAQLGDIQQRYSK<br/>DFSALWQAMAEGKAEATGP<br/>LHDRRFAGDAWRTNLPYRFA<br/>AAFYLLNARALTELDADAVEA<br/>DA<b>K</b>TRQRIRFAISQWVDAMS<br/>PANFLATNPEAQRLLESNGE<br/>SLRAGVRNMEDLTRGKISQ<br/>TDESAFEVGRNVAVTEGAVV<br/>FENEYFQLLQYKPLTDKVHA<br/>RPLLMVPPCINKYYILDQPE<br/>SSLVRHVVEQGHVFLVSWR<br/>NPDASMAGSTWDDYIEHAAI<br/>RAIEVARDISGQD<b>K</b>INVLGFC<br/>VGGTIVSTALAVLAARGEHP<br/>AASVTLTLLDFADTGILDV<br/>FVDEGHVQLREATLGGGAG<br/>APCALLRGLANTFSFLRPN<br/>DLVWNYVVDNYLK<b>G</b>NTPVP<br/>FDLLFWNGDATNLPGPWYC<br/>WYLRHTYLQNEL<b>K</b>VPG<b>K</b>LT<br/>VCGVPVDLASIDVPTYIYGSR<br/>EDHIVPWTAAAYASTALLANK<br/>LRFVLGASGHIAGVINPPAKN<br/>KRSHWTNDALPESPQQWLA<br/>GAIEHHGSWWPDWTAWLAG<br/>QAGAKRAAPANYGNARYRA<br/>IEPAPGRYVKAKA<br/>Red: Potential polysaccharide<br/>conjugation sites sterically<br/>impacting on trypsin digest (sites<br/>are not part of identified peptide)<br/><b>K: 482, 601, 774, 913, 917</b><br/>Lysine residues (labelled in bold)<br/>represent putative polysaccharide<br/>conjugations sites:<br/><b>K: 30, 123, 173, 185, 552 (90 in<br/>PhaC), 875 (413 in PhaC), 960<br/>(498 in PhaC)</b></p> |
| <p>Soluble<br/>NadA versus<br/>conjugated<br/>soluble NadA<br/>(T)</p> | <p>AAETAAGKAEAAAGTAN<br/>AAETAAGKAEAAAGTANTAADK<br/>AEAVAAK<br/>AATVAIVAAAYNNGQEINGFK<br/>AATVAIVAAAYNNGQEINGFK+Dea<br/>midated (11)<br/>AATVAIVAAAYNNGQEINGFK+Dea<br/>midated (12) Deamidated (17)<br/>AATVAIVAAAYNNGQEINGFK+Dea<br/>midated(14)</p>                                                              | <p>NadA-His6: (49.2 kDa)<br/>MATSDDDV<b>K</b>KAAATVAIVAA<br/>YNNNGQEINGFKAGETIYDIGE<br/>DGTITQ<b>K</b>DATAADVEADDFK<br/>GLGLKKVVVTLNLTKTVNEN<b>K</b><br/>QNVDA<b>K</b>VKAAESEIEKLTTK<br/>LADTDAALADTDAALDETTN<br/>ALN<b>K</b>LGENTTFAEET<b>K</b>TNIV<br/><b>K</b>IDEKLEAVADTV<b>D</b>KHAEAF<br/>NDIADSLDETNTKADEAVKT<br/>ANEAKQTAETKQNVDAKV</p>                                                                                                                                                                                                                                                                                                                                                                                                                                                                                                                                                                                                                                                                                                                                                                                                  |

|  |                                                                                                                                                                                                                                                                                                                                                                                                                                                                                                                                                                                                                                                                                                                                               |                                                                                                                                                                                                                                                                                                                                                                                                                                                                                                                                                                                                                                                                                                                                                                                                                        |
|--|-----------------------------------------------------------------------------------------------------------------------------------------------------------------------------------------------------------------------------------------------------------------------------------------------------------------------------------------------------------------------------------------------------------------------------------------------------------------------------------------------------------------------------------------------------------------------------------------------------------------------------------------------------------------------------------------------------------------------------------------------|------------------------------------------------------------------------------------------------------------------------------------------------------------------------------------------------------------------------------------------------------------------------------------------------------------------------------------------------------------------------------------------------------------------------------------------------------------------------------------------------------------------------------------------------------------------------------------------------------------------------------------------------------------------------------------------------------------------------------------------------------------------------------------------------------------------------|
|  | <p>AGETIYDIGEDGTITQKDTSDDDV<br/> KK<br/> AGETIYDIGEDGTITQKDTSDDDV<br/> KK+Deamidated (16)<br/> AVGTSSGSSAAYHVG VNYEWK<br/> HAEAFNDIADSLDETNTK<br/> HAEAFNDIADSLDETNTKADEAV<br/> K+Deamidated (16)<br/> HAEAFNDIADSLDETNTKADEAV<br/> K+Deamidated (6)<br/> LADTDAALADTDAALDETTNALN<br/> K<br/> LADTDAALADTDAALDETTNALN<br/> K+Deamidated (20)<br/> LDETNTKADEAVKTANEAK+Carb<br/> amidomethyl (13) Deamidated (5)<br/> Formyl (19)<br/> LEAVADTVDKHAEAFNDIADSLD<br/> ETNTK<br/> LGENITTFAE<br/> LGENITTFAEETKTNIVK<br/> NITTFAEETK<br/> SAAYHVG VNYEWK<br/> SGSSAAYHVG VNYEWK<br/> SSGSSAAYHVG VNYEWK<br/> TDAALADTDAALDETTNALNK<br/> TIYDIGEDGTITQK<br/> TVAIVAAAYNNGQEINGFK+<br/> Deamidated (10) Deamidated (15)<br/> TVAIVTKTVNENKQNVDK</p> | <p>KAAETAAG<b>K</b>AEEAAAGTANT<br/> AAD<b>K</b>AEEVAA<b>K</b>VTDIKADIA<br/> TNKADIAKNSARIDSLDKNV<br/> ANLRKETRQGLAEQAALSGL<br/> FQPYNVGRFNVTAAVGGYKS<br/> ESAVAIGTGFRFTENFAAKAG<br/> VAVGTSSGSSAAYHVG VNYE<br/> <b>W</b>KAGETIYDIGEDGTITQ<b>K</b>D<br/> KAGETIYDIGEDGTITQ<b>K</b>DKA<br/> GETIYDIGEDGTITQ<b>K</b>DTSD<br/> DV<b>K</b>KAATVAIVTSDDDDV<b>K</b><br/> AATVAIVTKTVNEN<b>K</b>QNVD<br/> <b>A</b>KVKATKTVNENKQNVD<b>A</b><br/> <b>V</b>KAHHHHHH</p> <p>Lysine residues (labelled in bold)<br/> represent putative polysaccharide<br/> conjugations sites:<br/> <b>K: 9, 10, 30, 47, 79, 85, 123, 136,</b><br/> 141, 155, <b>173, 179, 185, 208, 223,</b><br/> 341, 358, 377, 396, 404, 405, <b>429,</b><br/> <b>435, 441</b> (bold number show sites<br/> identified in the NadA when fused<br/> to PhaC)</p> |
|--|-----------------------------------------------------------------------------------------------------------------------------------------------------------------------------------------------------------------------------------------------------------------------------------------------------------------------------------------------------------------------------------------------------------------------------------------------------------------------------------------------------------------------------------------------------------------------------------------------------------------------------------------------------------------------------------------------------------------------------------------------|------------------------------------------------------------------------------------------------------------------------------------------------------------------------------------------------------------------------------------------------------------------------------------------------------------------------------------------------------------------------------------------------------------------------------------------------------------------------------------------------------------------------------------------------------------------------------------------------------------------------------------------------------------------------------------------------------------------------------------------------------------------------------------------------------------------------|

\*, Samples were prepared as previously described<sup>7</sup>



**Supplementary Table 7:**

**IgG/IgM ratio after first (1D) and third (3D) blood collection assayed against MenC.**

| <b>Vaccinated groups</b> | <b>Mean IgG (1D)</b> | <b>Mean IgG (3D)</b> | <b>Mean IgM (1D)</b> | <b>Mean IgM (3D)</b> | <b>Ratio IgG/IgM (1D)</b> | <b>Ratio IgG/IgM (3D)</b> |
|--------------------------|----------------------|----------------------|----------------------|----------------------|---------------------------|---------------------------|
| MenC-PhaC-NadA           | 231                  | 3400                 | 325                  | 400                  | 0.7                       | 8.5                       |
| MenC-PhaC                | 200                  | 5600                 | 400                  | 400                  | 0.5                       | 14.0                      |
| MenC-NadA-His6           | 125                  | 2400                 | 500                  | 325                  | 0.25                      | 7.3                       |
| MenC-DT                  | 100                  | 1800                 | 400                  | 400                  | 0.25                      | 4.5                       |

### Supplementary Table 8

**Size distribution of PHB beads in vaccine formulations ( $\mu\text{m}$ ) as measured by dynamic laser scattering.** Dx represents the particle diameter corresponding to X% cumulative particle size distribution.

| Samples                    | PHB bead in PBS 1X |         |         | PHB bead in Al (OH) <sub>3</sub> |         |         |
|----------------------------|--------------------|---------|---------|----------------------------------|---------|---------|
|                            | Dx (10)            | Dx (50) | Dx (90) | Dx (10)                          | Dx (50) | Dx (90) |
| NadA-PhaC beads            | 0.6                | 6.55    | 60.9    | 0.832                            | 7.38    | 50.4    |
| GNA2091-fHbp-G1-PhaC beads | 3.8                | 9.5     | 68.6    | 3.7                              | 9.8     | 70.6    |
| PhaC-fHbp-G1-G1 beads      | 0.4                | 3.87    | 41.9    | 0.438                            | 4.22    | 58.6    |
| PhaC wild type bead        | 0.4                | 1.2     | 6.99    | 0.434                            | 2.77    | 18.4    |

## References

- 1 González-Miro, M. *et al.* Self-assembled particulate PsaA as vaccine against *Streptococcus pneumoniae* infection. *Heliyon* **3**, e00291 (2017).
- 2 Jones, C. & Lemercinier, X. Use and validation of NMR assays for the identity and O-acetyl content of capsular polysaccharides from *Neisseria meningitidis* used in vaccine manufacture. *Journal of pharmaceutical and biomedical analysis* **30**, 1233-1247 (2002).
- 3 Grage, K. *et al.* Bacterial polyhydroxyalkanoate granules: biogenesis, structure, and potential use as nano-/micro-beads in biotechnological and biomedical applications. *Biomacromolecules* **10**, 660-669 (2009).
- 4 Peters, V. & Rehm, B. H. In vivo monitoring of PHA granule formation using GFP-labeled PHA synthases. *FEMS Microbiol Lett* **248**, 93-100, doi:10.1016/j.femsle.2005.05.027 (2005).
- 5 Amara, A. A. & Rehm, B. H. Replacement of the catalytic nucleophile cysteine-296 by serine in class II polyhydroxyalkanoate synthase from *Pseudomonas aeruginosa*-mediated synthesis of a new polyester: identification of catalytic residues. *Biochem J* **374**, 413-421, doi:10.1042/BJ20030431 (2003).
- 6 Hooks, D. O., Blatchford, P. A. & Rehm, B. H. Bioengineering of bacterial polymer inclusions catalyzing the synthesis of N-acetylneuraminic acid. *Applied and environmental microbiology* **79**, 3116-3121 (2013).
- 7 Hooks, D. O. & Rehm, B. H. Insights into the surface topology of polyhydroxyalkanoate synthase: self-assembly of functionalized inclusions. *Applied microbiology and biotechnology* **99**, 8045-8053 (2015).
